# Supplementary material for: Reduced Replication of Highly Pathogenic Avian Influenza Virus in Duck Endothelial Cells Compared to Chicken Endothelial Cells Is Associated with Stronger Antiviral Responses
Source: MDPI journal article supplement (doi:10.3390/v14010165), 2022-01-17
Supplement: s1 [file s1]

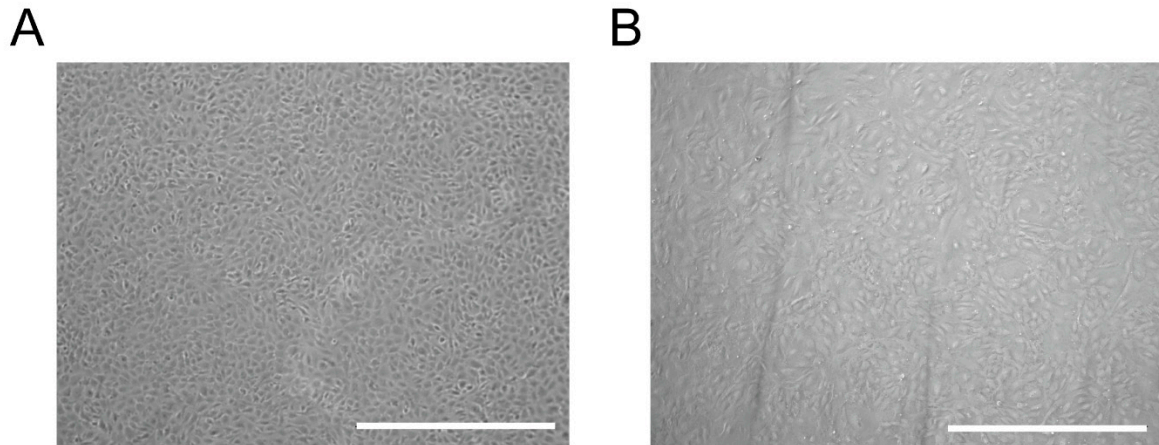

**Supplementary Figure S1. Primary AEC have an endothelial cell morphology.** Bright field microscopy pictures of chAEC p14 (A) and dAEC p15 (B). The scale bar represents 1 mm.

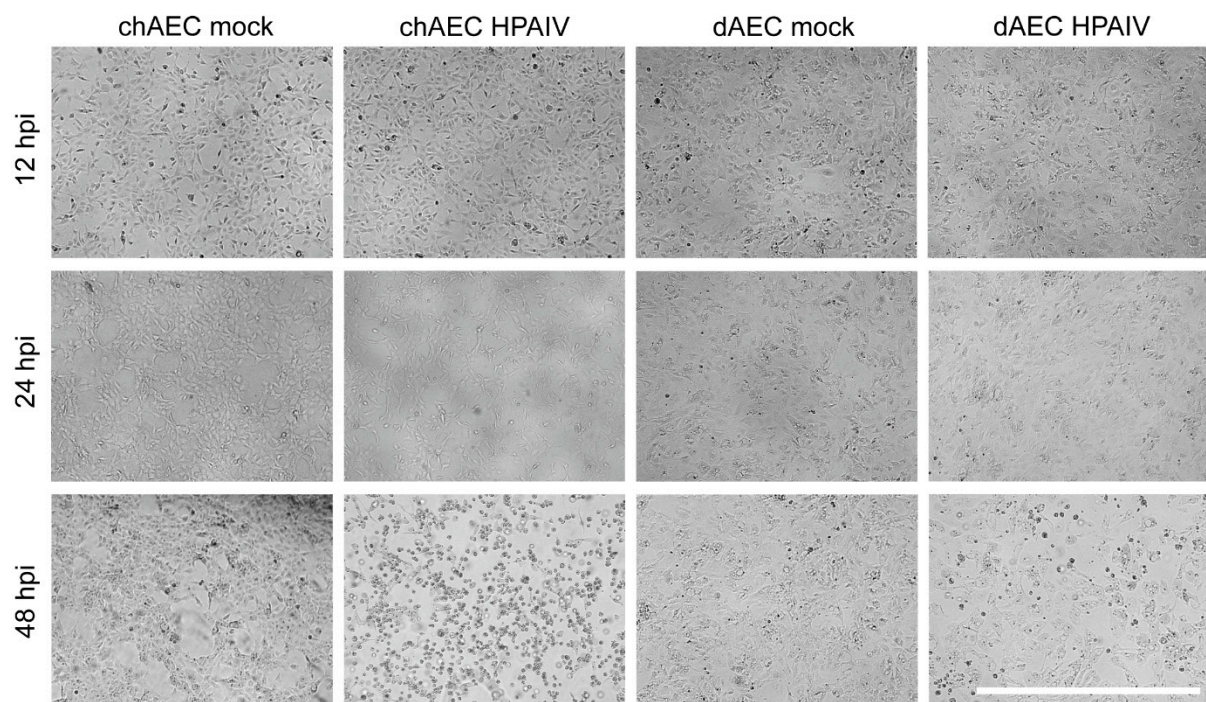

**Supplementary Figure S2. Delayed onset of cytopathic effects in dAEC compared to chAEC upon inoculation with HPAIV.** Representative bright field microscopy images of the multi-cycle replication experiment in Figure 3 panel C (see figure legend for details). The scale bar represents 1 mm.
